# Supplementary material for: Atomic force microscopy reveals involvement of the cell envelope in biomechanical properties of sickle erythrocytes
Source: PubMed Central journal article supplement (PMC9926656; doi:10.1186/s12915-023-01523-3), 2023-02-13

## The original, uncropped gels/blots

1. The original, uncropped blots for ApoA-1 (MW = ~28.3 kDa) in Fig. 1C (the dashed red box indicates the cropped blots used in the paper).

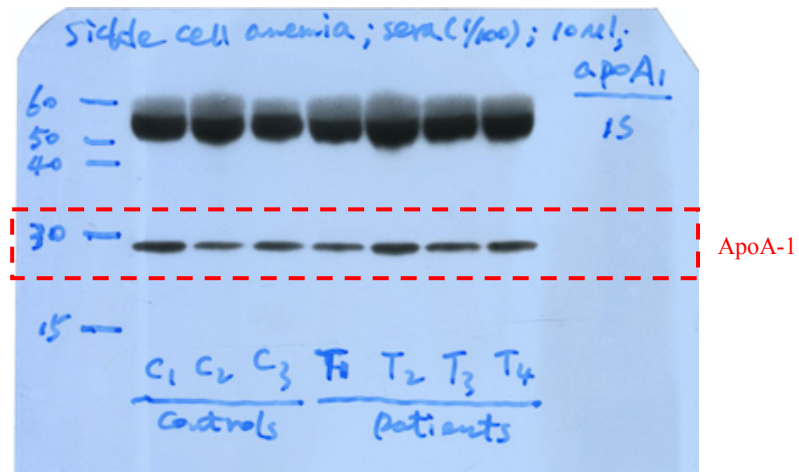

2. The original, uncropped blots for ApoB (the MW of ApoB-100 is ~510 kDa) in Fig. 1C (the dashed red box indicates the cropped blots used in the paper).

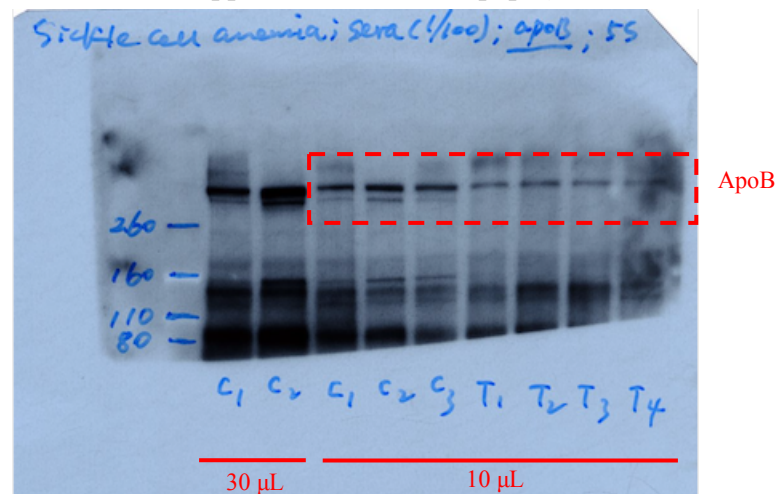

Supplement: 12915_2023_1523_MOESM1_ESM.pdf [file 12915_2023_1523_MOESM1_ESM.pdf]
